# Supplementary material
Source: PubMed Central journal article supplement (PMC5157120)
Supplement: NIHMS808390-supplement-supplement_1.pdf [file NIHMS808390-supplement-supplement_1.pdf]

**18DIV**

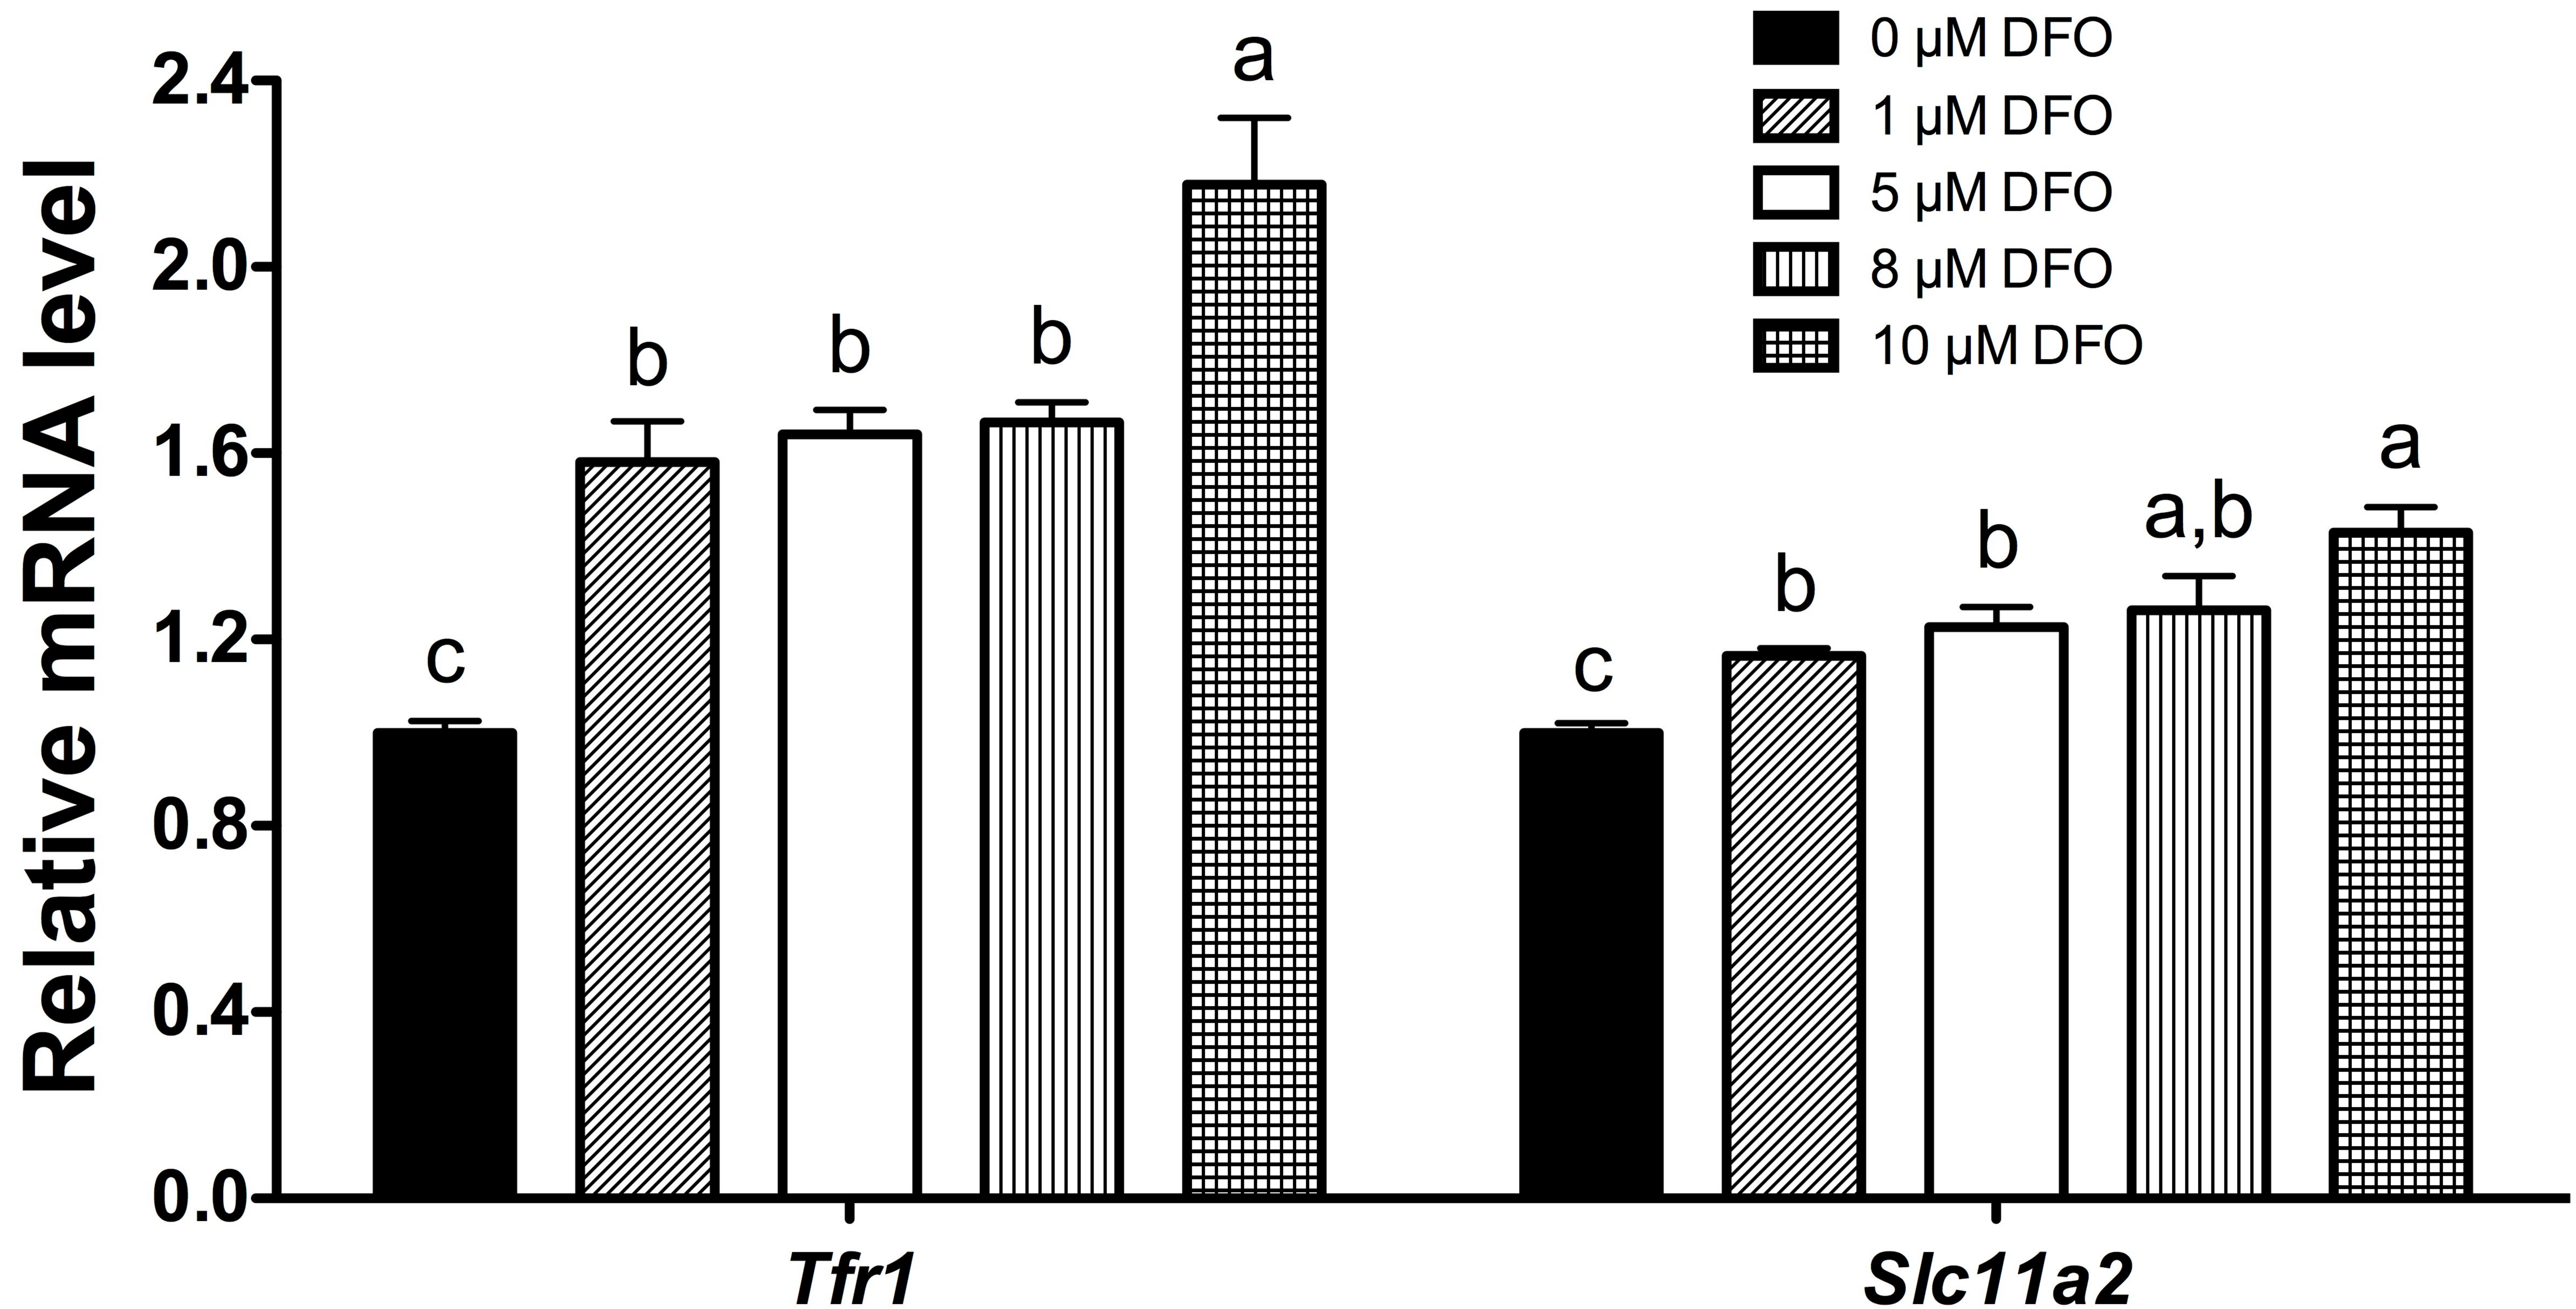

# *Znt-1*

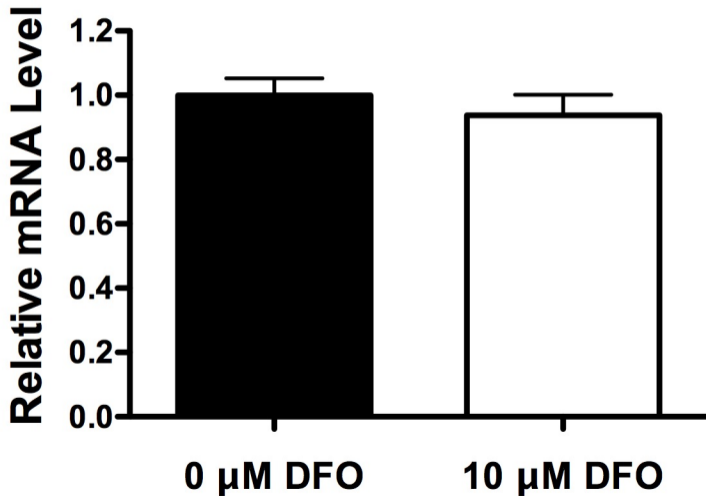

Supplemental Table 1: Seahorse Assay Protocol

| Command   | Time (min) | Drug Injection       | Cycles |
|-----------|------------|----------------------|--------|
| Calibrate |            |                      |        |
| Mix       | 3:00       | None                 | 3      |
| Wait      | 2:00       |                      |        |
| Measure   | 3:00       |                      |        |
| Mix       | 3:00       | Oligomycin           | 3      |
| Wait      | 2:00       |                      |        |
| Measure   | 3:00       |                      |        |
| Mix       | 3:00       | FCCP                 | 3      |
| Wait      | 2:00       |                      |        |
| Measure   | 3:00       |                      |        |
| Mix       | 3:00       | Antimycin A/Rotenone | 3      |
| Wait      | 2:00       |                      |        |
| Measure   | 3:00       |                      |        |

**Supplemental Figure Legends:**

**Supplemental Figure 1: The effect of various DFO doses on *Tfr1* and *Slc11a2* gene expression at 18DIV.** Hippocampal neurons cultured from E16 mice were treated with various DFO doses (i.e., 0, 1, 5, 8, or 10  $\mu$ M) and 5-FU beginning at 3DIV. At 18DIV, cells were collected, total RNA was extracted, and cDNA was synthesized. Quantitative real-time PCR (qPCR) was performed for *Tfr1* and *Slc11a2*, two IRE/IRP-regulated genes involved in neuronal iron uptake that index neuronal iron status. Relative mRNA levels are calculated relative to an internal control cDNA sample and a reference gene (i.e., *Thp*). The data from 1-3 independent cultures were pooled and are presented as mean  $\pm$  SEM. Groups not sharing a common letter (a > b > c) are significantly different by one-way ANOVA and Tukey's post-hoc multiple comparison test ( $p < 0.05$ ). n=4-10.

**Supplemental Figure 2: The effect of DFO treatment on neuronal zinc status.** Hippocampal neurons cultured from E16 mice were treated with DFO and 5-FU beginning at 3DIV. At 11DIV, cells were collected, total RNA was extracted, and cDNA was synthesized. Quantitative real-time PCR (qPCR) was performed for *Znt-1*, a gene coding for a zinc transporter, to index neuronal zinc status. Relative mRNA levels are calculated relative to an internal control cDNA sample and

a reference gene (i.e., *Tbp*). The data are presented as mean  $\pm$  SEM. There was no statistical difference between groups by Student's t-test ( $p < 0.05$ ). n=5.
